# Supplementary material
Source: PubMed Central journal article supplement (PMC7845014)
Supplement: oc0c01242_si_001.pdf [file oc0c01242_si_001.pdf]

# Supporting Information

## Modeling the binding mechanism of Remdesvir, Favilavir, and Ribavirin to SARS-CoV-2 RNA-dependent RNA polymerase

Fabian Byléhn<sup>1</sup>†, Cintia A. Menéndez<sup>1</sup>†, Gustavo R. Perez-Lemus<sup>1</sup>†, Walter Alvarado<sup>1,2</sup>† and Juan J. de Pablo<sup>1\*</sup>.

<sup>1</sup>Pritzker School of Molecular Engineering, University of Chicago, 5640 S. Ellis Avenue, Chicago, IL 60637.

<sup>2</sup>Biophysical Sciences, University of Chicago, 929 E. 54<sup>th</sup> Street, Chicago, IL 60637.

\*[depablo@uchicago.edu](mailto:depablo@uchicago.edu)

† These authors contributed equally to this work

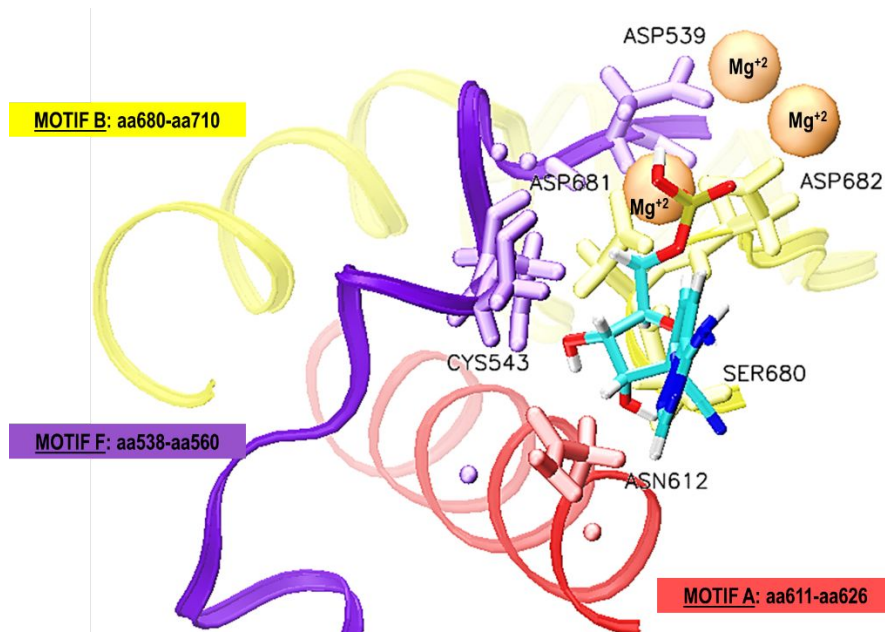

**Figure S1. Interactions among the non-natural nucleotide remdesivir and nsp12 conserve motifs located at the enzyme catalytic site:** the ligand mainly interact with the conserved motif A (red), B (yellow) and F (violet) trough Asn612, Ser680, Cys543 and Lys543 residues. Asp539, Asp681 and Asp682 belonging to motif B and F coordinate the  $Mg^{+2}$  ions.

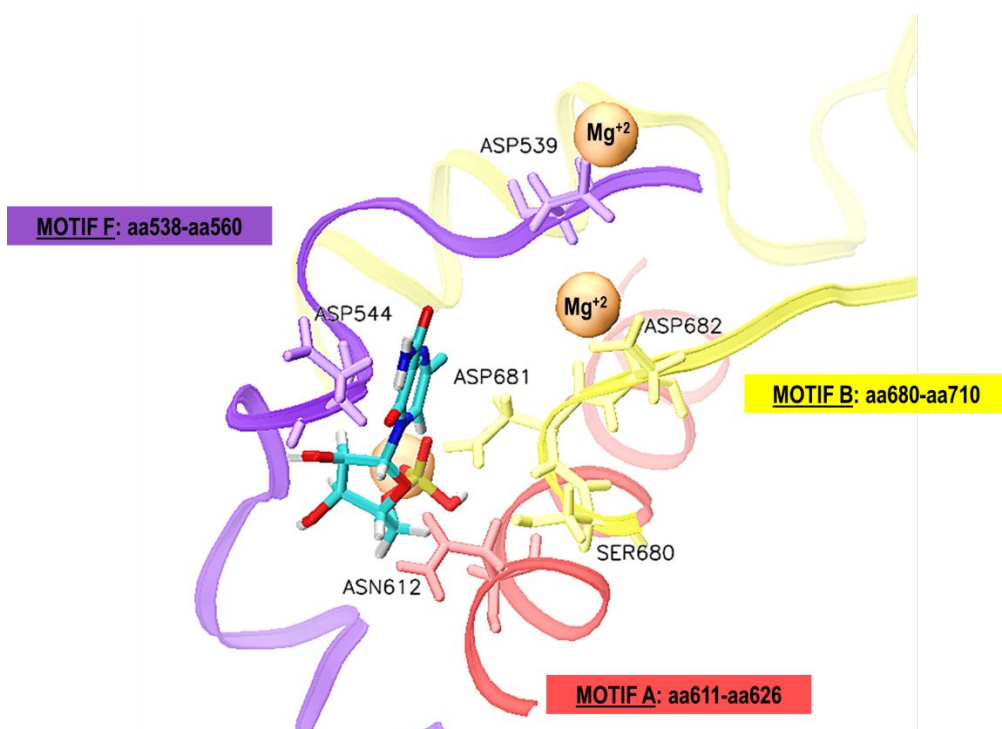

**Figure S2. Interactions among the non-natural nucleotide favilavir and nsp12 conserve motifs located at the enzyme catalytic site:** the ligand mainly interact with the conserved motif A (red), and B (yellow) trough Asn612 and Ser680. Asp539, Asp681 and Asp682 belonging to motif B and F coordinate the  $Mg^{+2}$  ions.

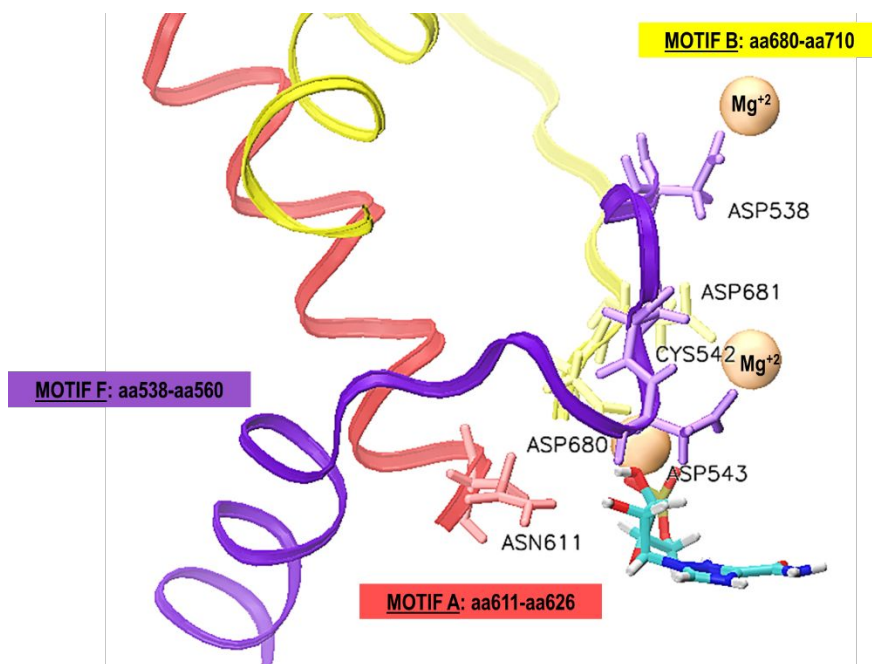

**Figure S3.** Interactions among the non-natural nucleotide ribavirin and nsp12 conserve motifs located at the enzyme catalytic site: the ligand mainly interact with the conserved motif A (red), and B (yellow) trough Asn611 and Ser680. Asp539, Asp681, Cys542 and Asp682 belonging to motif B and F coordinate the  $Mg^{+2}$  ions.

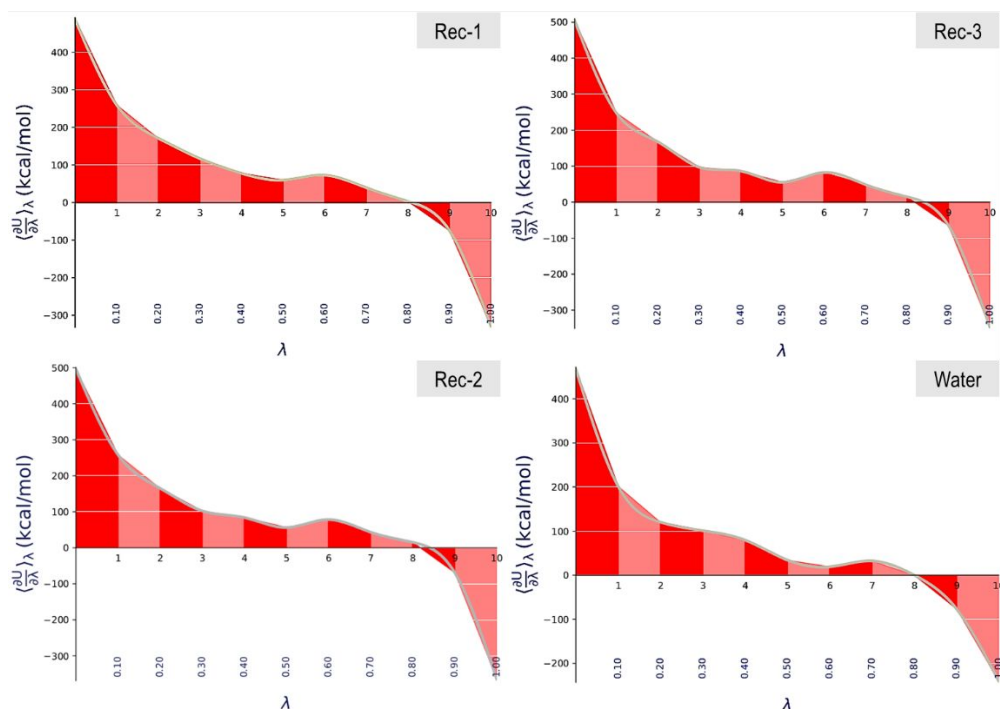

**Figure S4.** The thermodynamic force as a function of lambda for three independent replicas of the non-natural nucleotide **Favilavir** at the nsp12 protein active site (Rec-1, Rec-2 and Rec-3), as well as, the ligand in water media (Water).

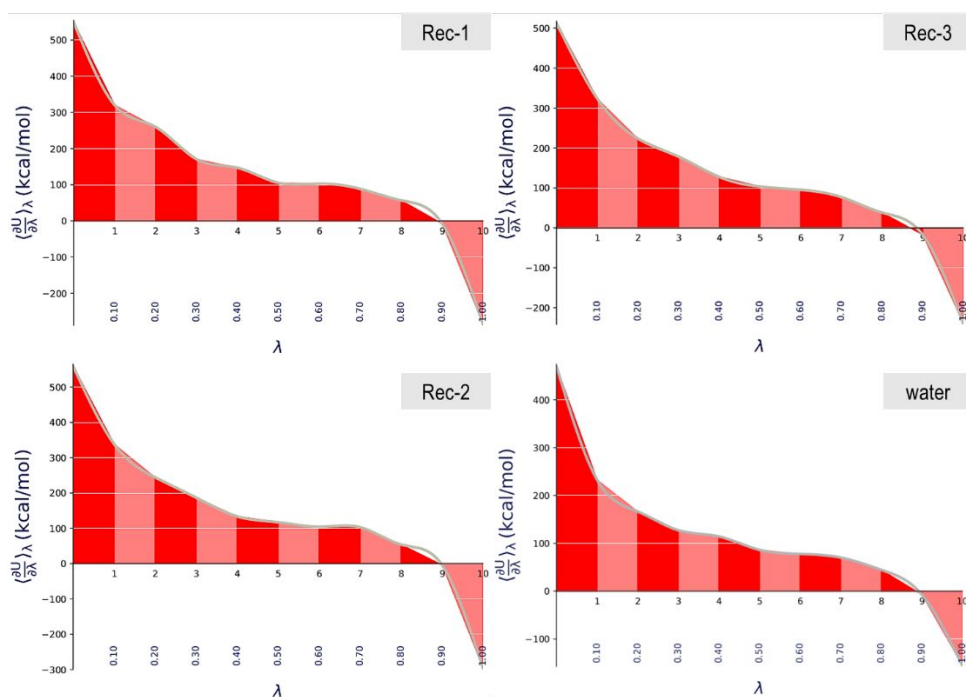

**Figure S5.** The thermodynamic force as a function of lambda for three independent replicas of the non-natural nucleotide Ribavirin at the nsp12 protein active site (Rec-1, Rec-2 and Rec-3), as well as, the ligand in water media (Water).

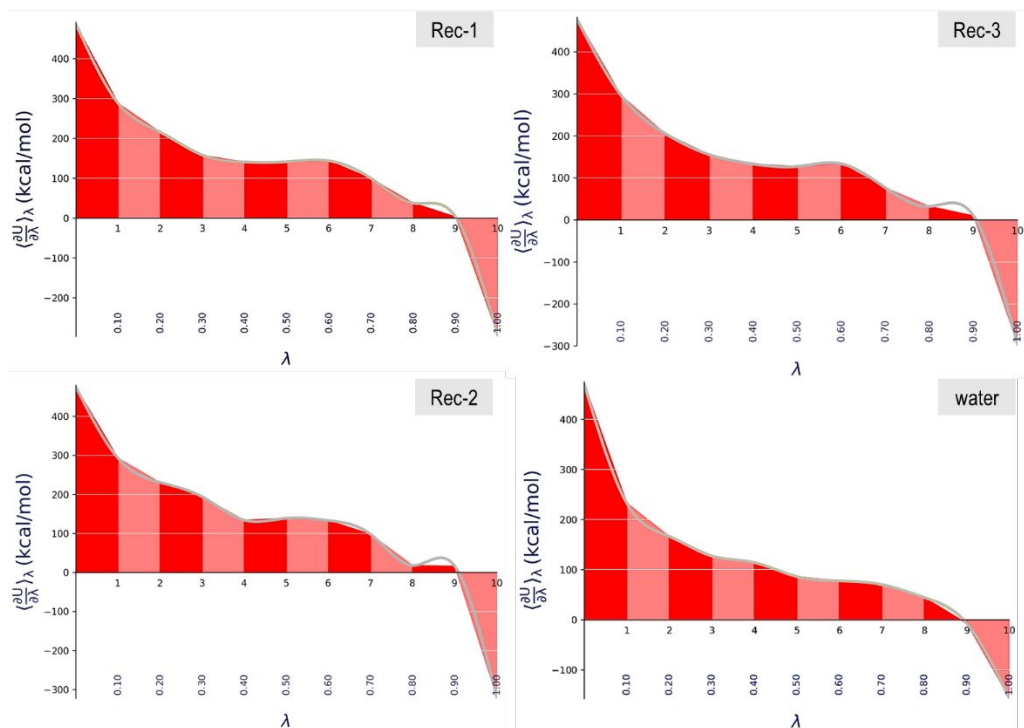

**Figure S6.** The thermodynamic force as a function of lambda for three independent replicas of the non-natural nucleotide **Remdesivir** at the nsp12 protein active site (Rec-1, Rec-2 and Rec-3), as well as, the ligand in water media (Water).
